# Supplementary material for: Tumor-microbiome links subtype, cellular programs, and immunity in pancreatic cancer
Source: Research Square preprint supplement (doi:10.21203/rs.3.rs-929279/v1), 2021-10-01
Supplement: Supplementary file 1 [file aa695fffe40de5b41a57f4fa.xlsx]

## Sheet: Table S3
Table S3. LASSO coefficients of sample-level microbiota abundances used to predict sample somatic cellular composition
	Acinar	B cells	Ductal1	Ductal2	Endocrine	Endothelial	Fibroblast	Myeloid	Stellate	T cells
Intercept	3.18157e-17	-2.92322e-17	4.53569e-17	-1.09081e-16	-2.68026e-16	-2.87594e-16	-2.45764e-16	3.21929e-16	-1.55621e-16	-2.39815e-17
Aspergillus	-0.0145798	0.209532	-0.137263	0.276099	0.162004	0.0766943	0.406301	0.37868	0.568838	0.4654
Clostridium	-0.0347493	0.0392008	-0.0443244	0.0579005	0.0499386	0.0222002	0.0395031	0.0457312	0.0817697	0.0720345
Edwardsiella	0.00319083	-0.0224773	0.0177034	0.0557095	-0.00597807	-0.0571855	0.0161242	0.0351075	-0.00173081	0.0242637
Flexistipes	0.0031009	0.00337064	0.00261436	-0.0019094	0.000190757	0.00339996	-5.60253e-05	0.00233644	0.00196314	0.00242514
Granulibacter	0.0335856	-0.0314618	0.036277	-0.0723312	-0.00746366	-0.00303085	-0.0798365	-0.0454095	-0.054853	-0.046658
Halanaerobium	-0.0286482	0.0874134	-0.0308726	0.122238	0.0660983	0.00697639	0.0470801	0.126414	0.135978	0.140966
Haliangium	-0.0164603	0.0285564	-0.0498004	0.0421877	0.00757391	0.000977757	-0.0040278	0.0605271	0.0153864	0.0513172
Halomonas	0.0097171	0.131716	-0.0360828	-0.0115091	-0.0649884	-0.00653098	-0.0496037	0.063741	-0.0189689	0.0896956
Hypericibacter	0.102998	0.0400681	0.0641451	0.0457565	0.00462991	-0.0597219	0.0597086	0.0877619	0.0928424	0.0339653
Iodobacter	-0.203067	-0.100661	-0.202457	0.176631	-0.211264	-0.0838419	-0.179008	-0.160112	-0.0930171	-0.0815911
Jiangella	-0.112373	0.131699	-0.153279	0.176301	-0.196899	-0.257389	0.0976638	0.139301	-0.00651557	0.129172
Kangiella	0.0854351	-0.00647065	0.0769601	-0.0344649	0.0517261	-0.0235983	0.06797	0.0407487	0.0500528	-0.0283605
Kineobactrum	0.00185867	0.00379319	-0.0054023	0.00590679	-0.0114664	-0.0229437	0.00507485	0.023578	-0.019952	-0.00188585
Kluyveromyces	-0.0210808	0.00428402	-0.0469111	0.049013	-0.0887055	-0.0407955	-0.141642	-0.0123981	-0.0999649	-0.0145249
Komagataella	-0.0114895	-0.0102688	0.00175524	0.00646089	-0.0187361	-0.0162686	-0.0406058	-0.0120185	-0.0297054	-0.00928423
Labilibaculum	-0.0181942	-0.0400968	7.11554e-05	0.0249854	0.0647443	0.0354603	0.0650961	0.0276374	0.0930455	0.00112014
Lachancea	-0.0709021	-0.0337916	-0.0819766	-0.0498659	-0.172053	-0.10299	-0.277152	-0.108544	-0.181428	-0.103916
Methylobacterium	-0.00202622	-0.0161391	0.00105667	0.0118845	0.00993181	-0.0257371	0.00915837	0.00350366	-0.00387744	-0.00658271
Neisseria	0.0297856	-0.0760848	0.0403529	0.0226534	0.133477	0.0593839	0.00862794	-0.030121	0.00783795	-0.0197896
Nocardiopsis	-0.179281	-0.00198265	-0.181689	0.145877	0.0775676	-0.0715498	-0.0381866	-0.0205926	0.0237939	0.0336546
Pochonia	-0.0155703	-0.121043	-0.00996953	0.00895253	-0.0178652	-0.0969912	-0.0424082	0.00631903	-0.069619	-0.0740576
Pseudolysobacter	0.00272193	0.00627064	-0.0212088	0.0338565	0.0154852	-0.00719278	0.0296582	0.0562297	0.00941839	0.0288293
Pseudomonas	-0.0308871	0.00903032	-0.021569	-0.00982421	0.060429	0.02043	0.0436521	0.019853	0.0357095	0.0445799
Ralstonia	-0.00541663	0.0154773	-0.00875978	-0.00657296	0.00849849	0.00184835	-0.00490029	0.00452171	0.00601636	0.0133712
Rhodococcus	0.00386788	0.0171681	0.00568351	-0.00977292	0.0327151	0.035893	-0.0248944	0.00509065	0.0195876	0.0171037
Solitalea	0.120575	0.0399337	0.118766	-0.147746	0.127357	0.137731	0.0159597	0.0819054	0.0533744	-0.00332445
Sphingobacterium	0.354889	-0.0286035	0.136173	-0.0448196	0.126475	0.195665	-0.0603336	0.156564	-0.0585014	-0.0393993
Sporisorium	0.0319049	-0.00154025	0.024453	-0.0513776	-0.0660065	-0.0137923	-0.111329	0.0138075	-0.0836082	-0.0204992
Thermomonospora	-0.0279429	0.0535421	-0.0277501	0.0264641	-0.0240268	-0.0187365	-0.0165781	0.0343697	0.0100943	0.0321433
Thioalkalivibrio	0.0530645	0.0275591	-0.0413465	0.0621813	0.0310177	0.102861	0.0646562	0.0814392	0.0781076	0.00145282
Virgibacillus	-0.00309957	0.00596773	-0.00427509	0.00697373	-0.00108817	0.00045779	0.000792013	0.00429928	0.00483205	0.00822065
Xanthomonas	-0.0257609	0.024842	-0.0266491	0.0306465	-0.00987993	0.0136868	-0.0665869	0.0559647	0.0250337	0.0332304
Yarrowia	-0.0002838	-0.00147567	6.78659e-05	0.000362254	-0.00039583	-0.00161465	-0.000648957	0.000107987	-0.000883917	-0.000529636
